# Supplementary material for: Comprehensive analysis of the temperature dependence of the crystal structure of (1−x)K0.5Na0.5NbO3–xBa(Li1/4Nb3/4)O3piezoelectric ceramics
Source: Royal Society of Chemistry journal article supplement (doi:10.1039/d1tc05306j), 2022-01-01
Supplement: d1tc05306j1.pdf [file d1tc05306j1.pdf]

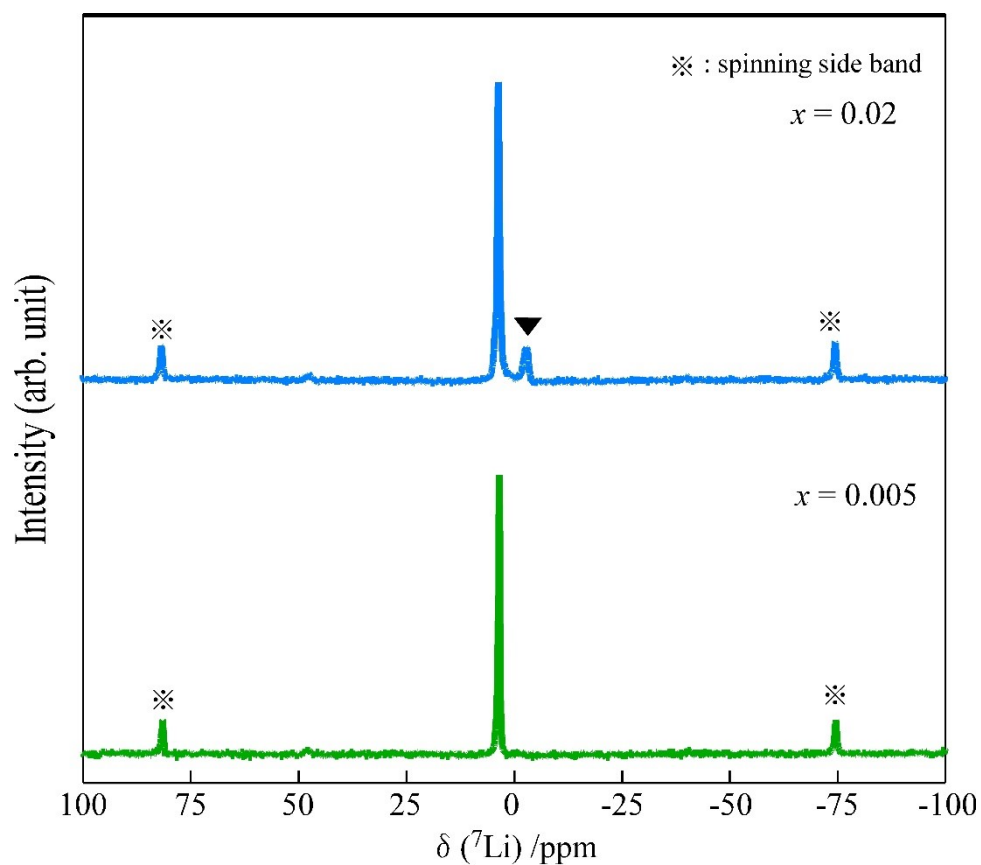

Fig. 1S.  $^7\text{Li}$  solid state NMR spectra of  $(1-x)\text{KNN}-x\text{BaLN}$  ceramics at  $x = 0.005$  and  $0.02$ . Strong signal of  $^7\text{Li}$  around 4 ppm in both the compositions is due to the  $\text{Li}^+$  cation in  $(1-x)\text{KNN}-x\text{BaLN}$  ceramics, while the weak signal around -3 ppm (marked as ▼) at  $x = 0.02$  is attributed to the presence of minor secondary phase.

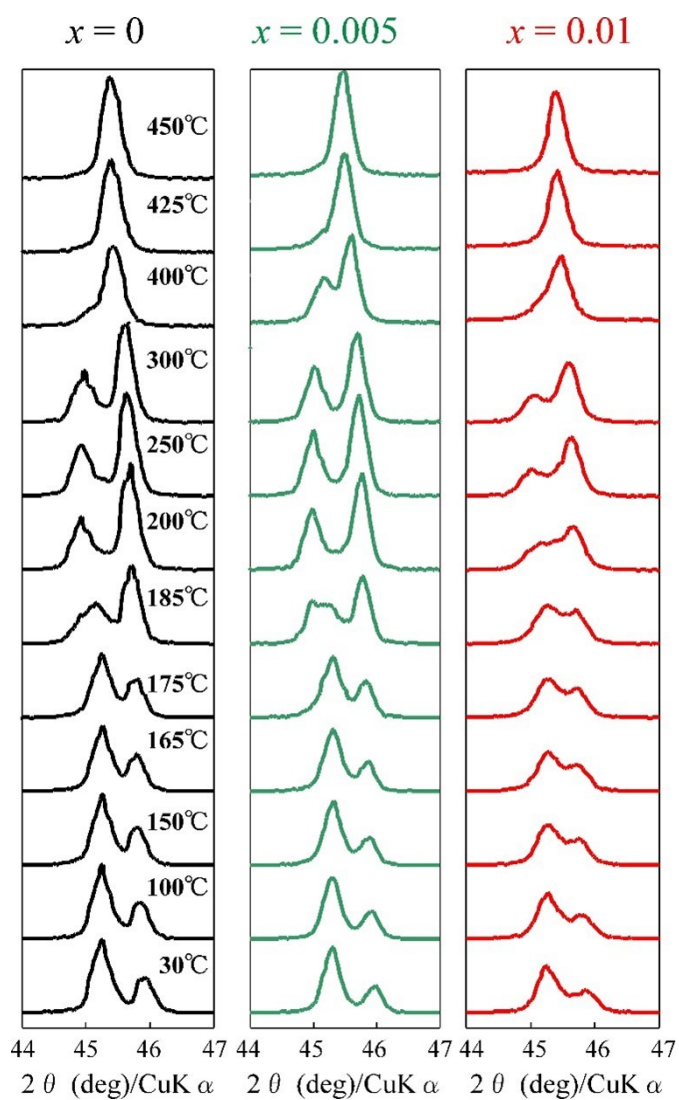

Fig. 2S. XRPD patterns of  $(1-x)\text{KNN}-x\text{BaLN}$  ceramics ( $x = 0, 0.005, \text{ and } 0.01$ ) in  $2\theta$  range of 44-47 degree measured at 30-450 °C after forged for 10 min at each temperature, suggesting the phase transition behavior from orthorhombic to tetragonal phase at the temperatures ranging from 185 °C to 200 °C and the presence of cubic phase above  $T_c$ .

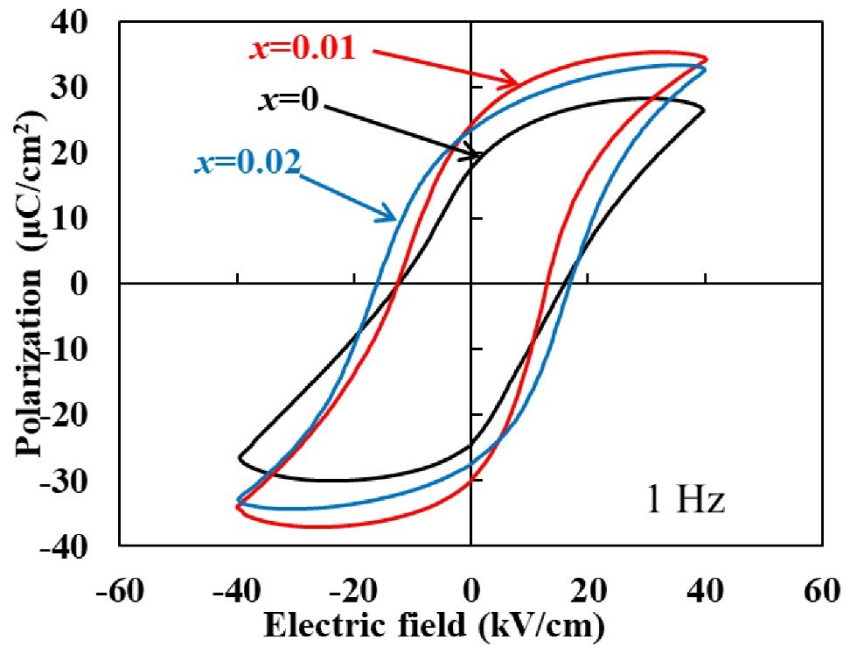

Fig. S3.  $P$ - $E$  hysteresis loops of  $(1-x)\text{KNN}-x\text{BaLN}$  ceramics with different compositions measured at 1 Hz.
